# Supplementary material for: Molecular Pac-Man and Tacos: layered Cu(ii) cages from ligands with high binding site concentrations
Source: Royal Society of Chemistry journal article supplement (doi:10.1039/c5dt01463h), 2015-01-01
Supplement: c5dt01463h1.pdf [file c5dt01463h1.pdf]

*Electronic Supplementary Information*

## **Molecular Pac-Men and Tacos: Layered Cu(II) cages from ligands with premeditated high binding site concentrations**

*Cecelia McDonald,<sup>b</sup> David W. Williams,<sup>a</sup> Pryanika Comar,<sup>c</sup> Simon J. Coles,<sup>d</sup> Tony D. Keene,<sup>d</sup>  
Mateusz B. Pitak,<sup>d</sup> Euan K. Brechin<sup>c</sup> and Leigh F. Jones.<sup>\*a,b†</sup>*

<sup>†</sup><sup>a</sup> *Current address: School of Chemistry, Bangor University, Bangor, Wales. LL57 2DG. Tel:  
+44(0)1248-38-2391. Email: [leigh.jones@bangor.ac.uk](mailto:leigh.jones@bangor.ac.uk)*

<sup>b</sup> *School of Chemistry, NUI Galway, University Road, Galway, Ireland.*

<sup>c</sup> *EaStCHEM School of Chemistry, Joseph Black Building, University of Edinburgh, West Mains  
Road, Edinburgh, Scotland. EH9 3JJ.*

<sup>d</sup> *UK National Crystallographic Service, Chemistry, Faculty of Natural and Environmental Sciences,  
University of Southampton, SO17 1BJ. UK.*

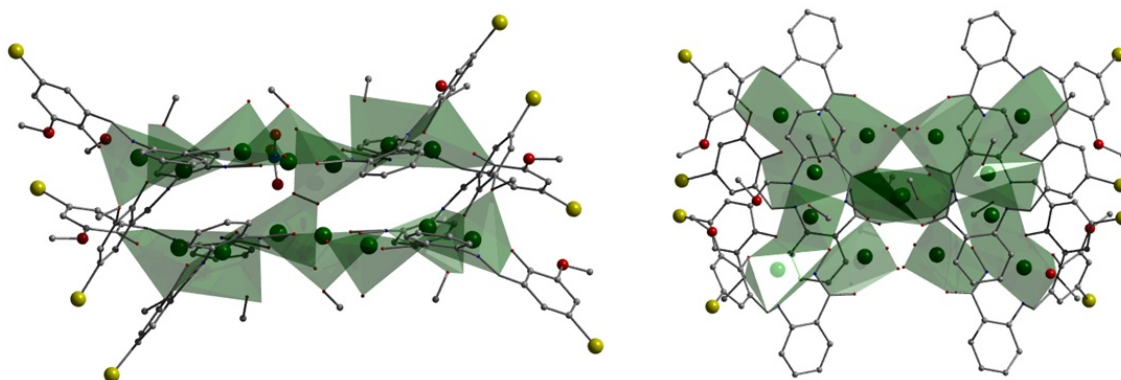

**Figure S1** Polyhedral representations of the crystal structure in **3** as viewed parallel (left) and perpendicular (right) to the {Cu<sub>7</sub>} planes. Hydrogen atoms and NO<sub>3</sub><sup>-</sup> counter anions have been omitted for clarity.

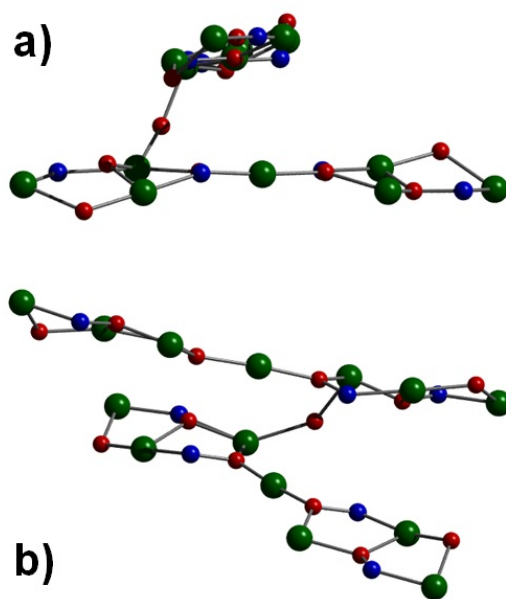

**Figure S2** The criss-cross orientation of the {Cu<sub>7</sub>} planes in **3** as viewed parallel (a) and off-set (b).

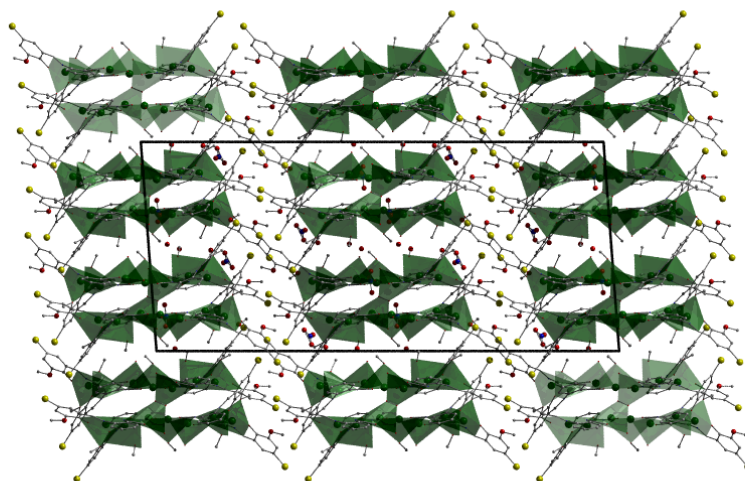

**Figure S3** Crystal packing arrangement observed in **3** as viewed along the *b* unit cell direction.

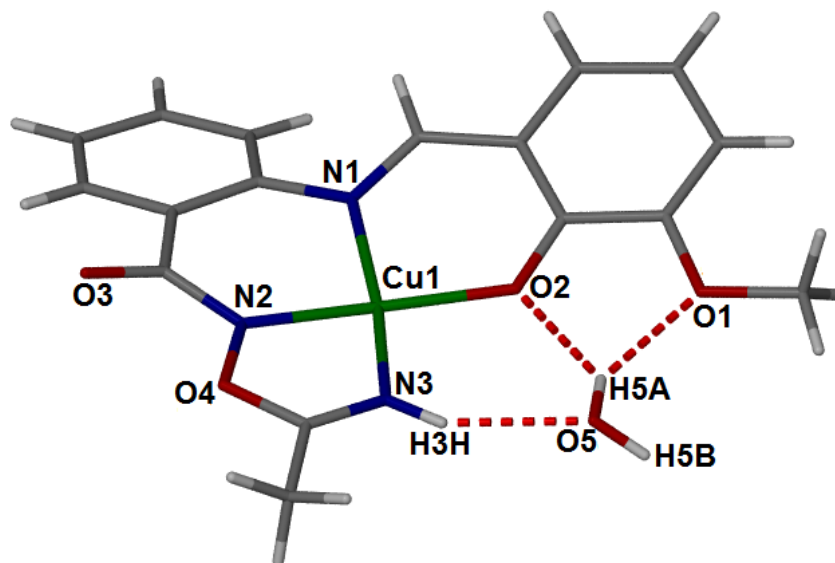

**Figure S4** The monomeric unit in **1** and its extensive H-bonding (dashed red lines) with a juxtaposed water of crystallisation. H-bond distances (Å): N3(H3H)···O5 = 2.142, O5(H5A)···O1 = 2.206 and O5(H5A)···O2 = 2.303.

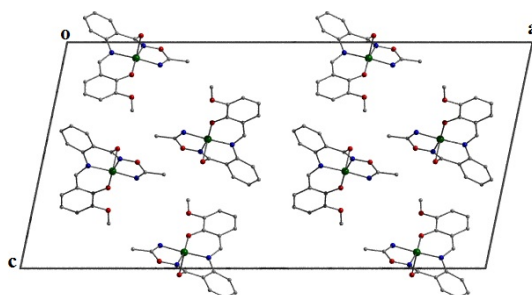

**Figure S5** Packing arrangement of 1D units of **6** as viewed down the *b* axis of the unit cell. Hydrogen atoms and H<sub>2</sub>O solvents of crystallisation have been removed for clarity.

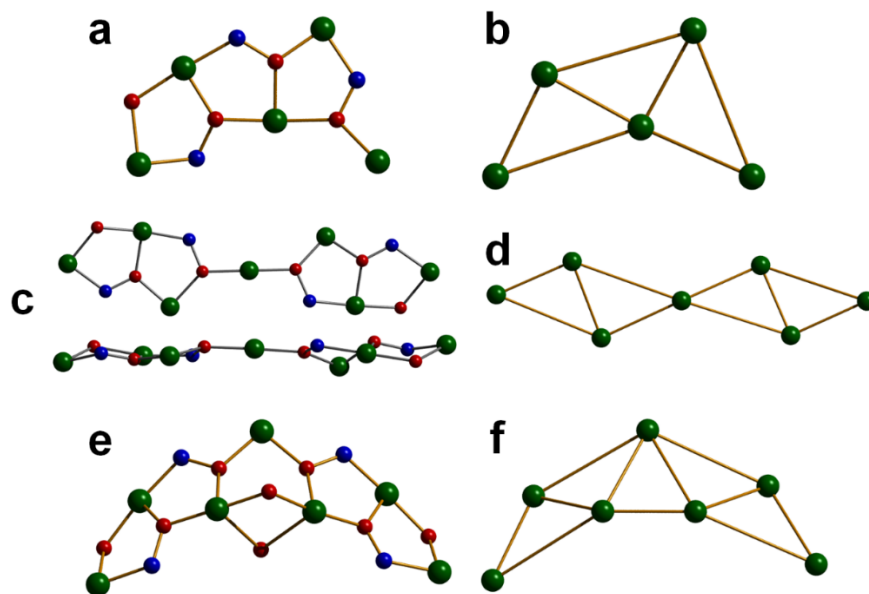

**Figure S6** (a) A  $\{Cu_5\}$  layer within the structure in **1**. (b) A skeletal representation of a  $\{Cu_5\}$  layer in **1**. (c) A  $\{Cu_7\}$  layer observed within the structures of **2-4** as viewed perpendicular and parallel to their heptanuclear planes. (d) A skeletal representation of a  $\{Cu_7\}$  layer observed in complexes **2-4**. (e) A  $\{Cu_7\}$  within the structure in **5**. (f) A skeletal representation of a  $\{Cu_7\}$  layer in the structure of **5**.

**Table S1** Crystallographic data obtained from complexes **1-4**

|                                            | <b>1</b>                                                                                         | <b>2.3MeOH.7H<sub>2</sub>O</b>                                                       | <b>3</b>                                                                                                 | <b>4.4MeOH.4H<sub>2</sub>O</b>                                                     |
|--------------------------------------------|--------------------------------------------------------------------------------------------------|--------------------------------------------------------------------------------------|----------------------------------------------------------------------------------------------------------|------------------------------------------------------------------------------------|
| Formula <sup>a</sup>                       | C <sub>74</sub> H <sub>60</sub> N <sub>12</sub> O <sub>38</sub> Cl <sub>4</sub> Cu <sub>10</sub> | C <sub>125.5</sub> H <sub>125</sub> N <sub>16</sub> O <sub>57</sub> Cu <sub>14</sub> | C <sub>123</sub> H <sub>101.17</sub> N <sub>20</sub> O <sub>42.58</sub> Br <sub>8</sub> Cu <sub>14</sub> | C <sub>122</sub> H <sub>124</sub> N <sub>20</sub> O <sub>60</sub> Cu <sub>14</sub> |
| <i>M<sub>w</sub></i>                       | 2502.54                                                                                          | 3827.01                                                                              | 4013.52                                                                                                  | 3643.88                                                                            |
| Crystal System                             | Monoclinic                                                                                       | Triclinic                                                                            | Monoclinic                                                                                               | Monoclinic                                                                         |
| Space group                                | <i>C2/c</i>                                                                                      | <i>P</i> -1                                                                          | <i>C2/c</i>                                                                                              | <i>P2<sub>1</sub>/c</i>                                                            |
| <i>a</i> /Å                                | 23.6341(10)                                                                                      | 15.4185(6)                                                                           | 47.208(3)                                                                                                | 18.989(4)                                                                          |
| <i>b</i> /Å                                | 25.5162(8)                                                                                       | 22.8429(7)                                                                           | 16.6283(12)                                                                                              | 13.838(3)                                                                          |
| <i>c</i> /Å                                | 16.5739(9)                                                                                       | 25.1092(9)                                                                           | 21.3697(15)                                                                                              | 26.748(5)                                                                          |
| <i>α</i> <sup>o</sup>                      | 90.00                                                                                            | 71.435(3)                                                                            | 90.00                                                                                                    | 90.00                                                                              |
| <i>β</i> <sup>o</sup>                      | 104.244(5)                                                                                       | 77.204(3)                                                                            | 94.2850(10)                                                                                              | 91.05(3)                                                                           |
| <i>γ</i> <sup>o</sup>                      | 90.00                                                                                            | 80.405(3)                                                                            | 90.00                                                                                                    | 90.00                                                                              |
| <i>V</i> /Å <sup>3</sup>                   | 9687.7(8)                                                                                        | 8130.8(5)                                                                            | 16728(2)                                                                                                 | 7028(2)                                                                            |
| <i>Z</i>                                   | 4                                                                                                | 2                                                                                    | 4                                                                                                        | 2                                                                                  |
| <i>T</i> /K                                | 150(2)                                                                                           | 173(2)                                                                               | 173(2)                                                                                                   | 150(2)                                                                             |
| <i>λ</i> <sup>b</sup> /Å                   | 0.71073                                                                                          | 0.71073                                                                              | 0.71073                                                                                                  | 0.71073                                                                            |
| <i>D<sub>c</sub></i> /g cm <sup>-3</sup>   | 1.716                                                                                            | 1.563                                                                                | 1.594                                                                                                    | 1.722                                                                              |
| <i>μ</i> (Mo-K $\alpha$ )/mm <sup>-1</sup> | 2.348                                                                                            | 1.882                                                                                | 3.723                                                                                                    | 2.169                                                                              |
| Meas./indep.( <i>R<sub>m</sub></i> ) refl. | 8858/5297 (0.1077)                                                                               | 28668/13027 (0.1112)                                                                 | 19105 / 12747(0.0572)                                                                                    | 12859/8415(0.1128)                                                                 |
| w <i>R</i> 2 (all data) <sup>c</sup>       | 0.1766                                                                                           | 0.2446                                                                               | 0.1503                                                                                                   | 0.2302                                                                             |
| <i>R</i> 1 <sup>d,e</sup>                  | 0.0658                                                                                           | 0.0861                                                                               | 0.0551                                                                                                   | 0.0948                                                                             |
| Goodness of fit on <i>F</i> <sup>2</sup>   | 1.010                                                                                            | 0.937                                                                                | 1.058                                                                                                    | 1.050                                                                              |

<sup>a</sup> Includes guest molecules (does not include SQUEEZE results obtained on **2-4**).<sup>b</sup> Mo-K $\alpha$  radiation, graphite monochromator. <sup>c</sup>  $wR2 = [\sum w(|F_o|^2 - |F_c|^2)|^2 / \sum w|F_o|^2]^2$ . <sup>d</sup>For observed data. <sup>e</sup>  $R1 = \sum ||F_o| - |F_c|| / \sum |F_o|$ .

**Table S2** Crystallographic data obtained from complex **5** and **6**.

| <b>Complex</b>                                     | <b>5</b>                                                                                           | <b>6·H<sub>2</sub>O</b>                                                       |
|----------------------------------------------------|----------------------------------------------------------------------------------------------------|-------------------------------------------------------------------------------|
| Formula <sup>a</sup>                               | C <sub>246</sub> H <sub>202</sub> N <sub>32</sub> O <sub>94</sub> Cl <sub>4</sub> Cu <sub>30</sub> | C <sub>17</sub> H <sub>17</sub> N <sub>3</sub> O <sub>5</sub> Cu <sub>1</sub> |
| <i>M<sub>w</sub></i>                               | 7158.38                                                                                            | 406.88                                                                        |
| Crystal System                                     | Triclinic                                                                                          | Monoclinic                                                                    |
| Space group                                        | <i>P</i> -1                                                                                        | <i>C</i> 2/ <i>c</i>                                                          |
| <i>a</i> /Å                                        | 18.6255(5)                                                                                         | 36.1459(12)                                                                   |
| <i>b</i> /Å                                        | 20.6535(7)                                                                                         | 5.2200(2)                                                                     |
| <i>c</i> /Å                                        | 38.2976(12)                                                                                        | 18.0068(7)                                                                    |
| <i>α</i> /°                                        | 92.913(3)                                                                                          | 90.00                                                                         |
| <i>β</i> /°                                        | 99.064(3)                                                                                          | 101.697(3)                                                                    |
| <i>γ</i> /°                                        | 103.632(3)                                                                                         | 90.00                                                                         |
| <i>V</i> /Å <sup>3</sup>                           | 14079.1(8)                                                                                         | 3327.0(2)                                                                     |
| <i>Z</i>                                           | 2                                                                                                  | 8                                                                             |
| <i>T</i> /K                                        | 150(2)                                                                                             | 150(2)                                                                        |
| <i>λ</i> <sup>b</sup> /Å                           | 0.71073                                                                                            | 0.71073                                                                       |
| <i>D<sub>c</sub></i> /g cm <sup>-3</sup>           | 1.689                                                                                              | 1.625                                                                         |
| <i>μ</i> (Mo-Kα)/ mm <sup>-1</sup>                 | 2.340                                                                                              | 1.348                                                                         |
| Meas./indep., ( <i>R</i> <sub>int</sub> )<br>refl. | 51469/25059 (0.1034)                                                                               | 3047/2627,<br>(0.0249)                                                        |
| wR2 (all data)                                     | 0.3398                                                                                             | 0.0842                                                                        |
| <i>R</i> 1 <sup>d,e</sup>                          | 0.1234                                                                                             | 0.0315                                                                        |
| Goodness of fit<br>(GOOF) on <i>F</i> <sup>2</sup> | 1.054                                                                                              | 1.066                                                                         |

<sup>a</sup> Includes guest molecules (does not include SQUEEZE results on complex **5**). <sup>b</sup> Mo-Kα radiation, graphite monochromator. <sup>c</sup>  $wR2 = [\sum w(|F_o|^2 - |F_c|^2)|^2] / \sum w|F_o|^2]^{1/2}$ . <sup>d</sup> For observed data. <sup>e</sup>  $R1 = \sum ||F_o| - |F_c|| / \sum |F_o|$ .
